# Supplementary material
Source: PubMed Central journal article supplement (PMC2649737)
Supplement: NIHMS80698-supplement-Supporting_Inf.pdf [file NIHMS80698-supplement-Supporting_Inf.pdf]

Supplemental Material for  
“Generation of Hydroxyl Radicals from Ambient Fine Particles  
in a Surrogate Lung Fluid Solution”

by Edgar Vidrio, Chin Phuah, Ann M. Dillner and Cort Anastasio  
University of California - Davis

Revised Version Submitted to Environmental Science & Technology, November 20, 2008

This supplemental material contains 6 pages, composed of this cover page, two figures, and 3 tables.

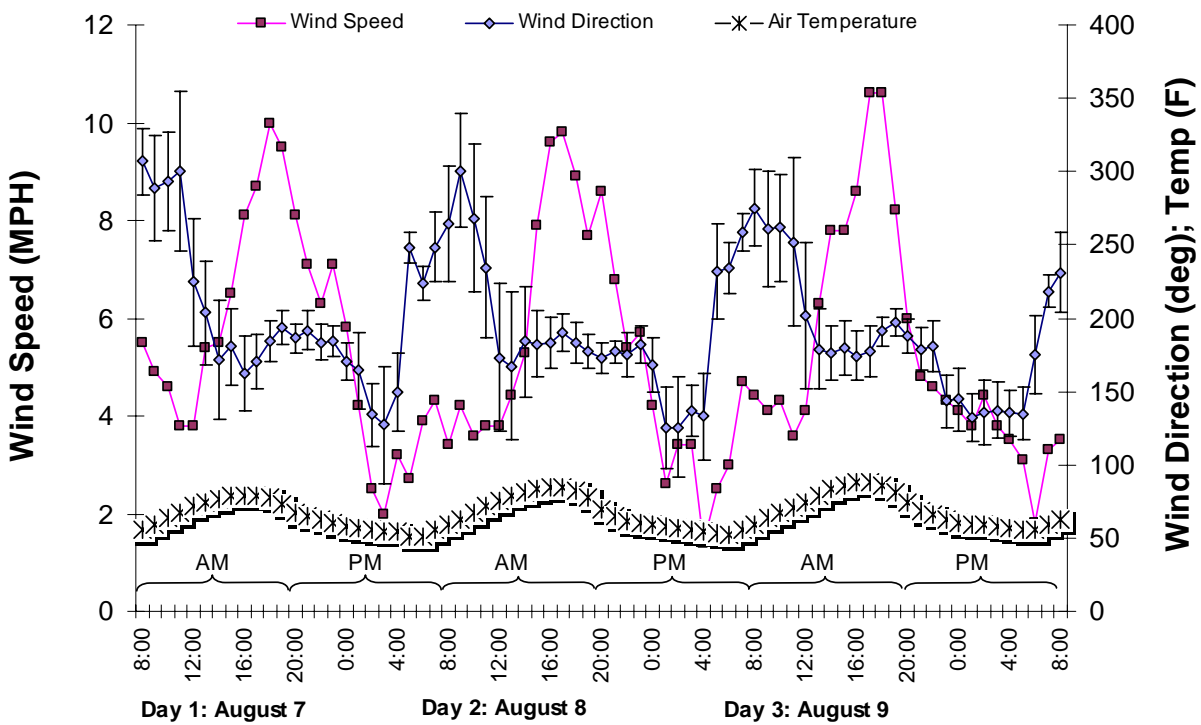

Figure S1. Wind speed, direction, and air temperature for PM<sub>2.5</sub> samples collected from August 7th to 9th 2007 (see Figure 2 in text for OH data).

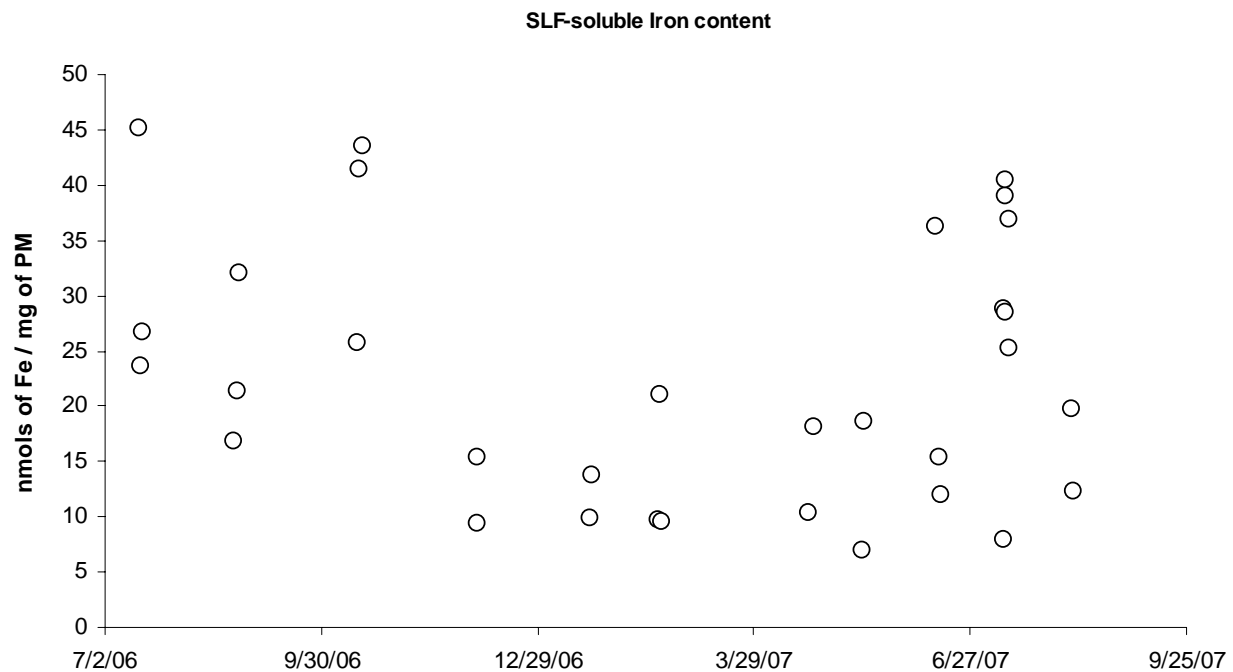

Figure S2. PM-mass-normalized SLF-soluble iron as a function of sampling date.

Table S1. Total and surrogate lung fluid (SLF)-soluble metal concentrations in PM<sub>2.5</sub> samples determined by XRF and ICP-MS analysis. Units are nmol-metal mg<sup>-1</sup>-PM<sub>2.5</sub> with variability of 1σ.

| Metal      | Total element content |                    |                 |                    | SLF-soluble element content |                    |                 |                   |
|------------|-----------------------|--------------------|-----------------|--------------------|-----------------------------|--------------------|-----------------|-------------------|
|            | Spring<br>(n = 9)     | Summer<br>(n = 33) | Fall<br>(n = 3) | Winter<br>(n = 10) | Spring<br>(n = 9)           | Summer<br>(n = 33) | Fall<br>(n = 3) | Winter<br>(n = 9) |
| Aluminum   | 300 ± 23              | 360 ± 24           | 729 ± 43        | 150 ± 12           | 185 ± 69                    | 48 ± 29            | 101 ± 50        | 126 ± 46          |
| Silicon    | 817 ± 44              | 792 ± 17           | 2061 ± 105      | 422 ± 23           | n/a                         | n/a                | n/a             | n/a               |
| Phosphorus | 61 ± 7                | 6.9 ± 0.7          | 24 ± 3          | 15 ± 1             | n/a                         | n/a                | n/a             | n/a               |
| Sulfur     | 1931 ± 98             | 2005 ± 102         | 1336 ± 68       | 608 ± 31           | n/a                         | n/a                | n/a             | n/a               |
| Chlorine   | 394 ± 21              | 150 ± 10           | 22 ± 2          | 177 ± 9            | n/a                         | n/a                | n/a             | n/a               |
| Potassium  | 285 ± 11              | 141 ± 4            | 318 ± 12        | 144 ± 4            | n/a                         | n/a                | n/a             | n/a               |
| Calcium    | 210 ± 11              | 169 ± 9            | 214 ± 11        | 94 ± 5             | n/a                         | n/a                | n/a             | n/a               |
| Titanium   | 13 ± 1                | 14 ± 0.1           | 26 ± 1          | 6 ± 1              | n/a                         | n/a                | n/a             | n/a               |
| Vanadium   | 3.2 ± 0.4             | 3.8 ± 0.4          | 2.7 ± 0.4       | 1.6 ± 0.2          | 0.5 ± 0.4                   | 1.4 ± 0.8          | 0.5 ± 0.4       | 0.1 ± 0.06        |
| Chromium   | 1.0 ± 0.1             | 0.9 ± 0.2          | 1.3 ± 0.2       | 0.7 ± 0.1          | n/a                         | n/a                | n/a             | n/a               |
| Manganese  | 5.0 ± 0.3             | 4.6 ± 0.3          | 9.8 ± 0.6       | 3.1 ± 0.2          | 2.9 ± 1.8                   | 2.7 ± 2.0          | 4.0 ± 4.3       | 3.0 ± 1.5         |
| Iron       | 183 ± 9               | 245 ± 12           | 360 ± 17        | 152 ± 7            | 18 ± 11                     | 26 ± 13            | 37 ± 10         | 13 ± 4            |
| Nickel     | 0.6 ± 0.1             | 1.2 ± 0.1          | 0.9 ± 0.1       | 0.2 ± 0.0          | n/a                         | n/a                | n/a             | n/a               |
| Copper     | 3.7 ± 0.3             | 3.0 ± 0.2          | 2.9 ± 0.2       | 3.9 ± 0.2          | 1.6 ± 1.3                   | 0.9 ± 0.7          | 2.3 ± 0.0       | 2.5 ± 1.9         |
| Zinc       | 9.6 ± 0.5             | 7.0 ± 0.4          | 5.9 ± 0.4       | 9.1 ± 0.5          | 2.9 ± 1.7                   | 4.1 ± 5.9          | 1.3 ± 0.3       | 3.9 ± 2.1         |
| Arsenic    | 0.2 ± 0.1             | 0.0 ± 0.0          | 0.0 ± 0.0       | 0.2 ± 0.1          | n/a                         | n/a                | n/a             | n/a               |
| Cobalt     | n/a                   | n/a                | n/a             | n/a                | 0.2 ± 0.1                   | 0.1 ± 0.04         | 0.2 ± 0.1       | 0.1 ± 0.05        |

Table S2. Element correlations with OH generation segregated by season. The OH and metal amounts in the correlations were both expressed in units of nmol filter<sup>-1</sup>.

|           | Correlation with OH generation ( $r^2$ ) with... |                   |                 |                   |                                 |               |                   |               |
|-----------|--------------------------------------------------|-------------------|-----------------|-------------------|---------------------------------|---------------|-------------------|---------------|
|           | Total element (by XRF)                           |                   |                 |                   | SLF-soluble element (by ICP-MS) |               |                   |               |
|           | Overall<br>(n)                                   | Spring<br>(41-43) | Summer<br>(5-6) | Winter<br>(26-27) | Overall<br>(31-35)              | Spring<br>(6) | Summer<br>(14-18) | Winter<br>(8) |
| Aluminum  | 0.06                                             | 0.15              | 0.05            | 0.81              | 0.05                            | 0.10          | 0.03              | 0.22          |
| Silicon   | 0.01                                             | 0.09              | 0.00            | 0.06              | n/a                             | n/a           | n/a               | n/a           |
| Sulfur    | 0.04                                             | 0.14              | 0.03            | 0.02              | n/a                             | n/a           | n/a               | n/a           |
| Calcium   | 0.01                                             | 0.05              | 0.05            | 0.26              | n/a                             | n/a           | n/a               | n/a           |
| Vanadium  | 0.22                                             | 0.10              | 0.24            | 0.92              | 0.22                            | 0.15          | 0.26              | 0.17          |
| Chromium  | 0.04                                             | 0.46              | 0.00            | 0.00              | n/a                             | n/a           | n/a               | n/a           |
| Manganese | 0.10                                             | 0.10              | 0.09            | 0.94              | 0.13                            | 0.21          | 0.00              | 0.39          |
| Iron      | 0.13                                             | 0.31              | 0.12            | 0.97              | 0.11                            | 0.03          | 0.07              | 0.55          |
| Nickel    | 0.06                                             | 0.48              | 0.02            | 0.08              | n/a                             | n/a           | n/a               | n/a           |
| Copper    | 0.13                                             | 0.18              | 0.10            | 0.99              | 0.01                            | 0.03          | 0.02              | 0.40          |
| Zinc      | 0.11                                             | 0.17              | 0.02            | 0.93              | 0.07                            | 0.39          | 0.07              | 0.47          |
| Cobalt    | n/a                                              | n/a               | n/a             | n/a               | 0.47                            | 0.38          | 0.54              | 0.84          |

Table S3. Element correlations with OH generation segregated by season. The OH and metal amounts in the correlations were both expressed in units of nmol mg<sup>-1</sup>-PM.

|           | Correlation with OH generation (r <sup>2</sup> ) with... |        |        |        |                                 |        |        |        |
|-----------|----------------------------------------------------------|--------|--------|--------|---------------------------------|--------|--------|--------|
|           | Total element (by XRF)                                   |        |        |        | SLF-soluble element (by ICP-MS) |        |        |        |
|           | Overall                                                  | Spring | Summer | Winter | Overall                         | Spring | Summer | Winter |
| Aluminum  | 0.01                                                     | 0.15   | 0.00   | 0.25   | 0.00                            | 0.03   | 0.06   | 0.19   |
| Silicon   | 0.01                                                     | 0.19   | 0.00   | 0.10   | n/a                             | n/a    | n/a    | n/a    |
| Sulfur    | 0.24                                                     | 0.04   | 0.15   | 0.57   | n/a                             | n/a    | n/a    | n/a    |
| Calcium   | 0.03                                                     | 0.27   | 0.01   | 0.09   | n/a                             | n/a    | n/a    | n/a    |
| Vanadium  | 0.05                                                     | 0.08   | 0.06   | 0.27   | 0.02                            | 0.14   | 0.02   | 0.25   |
| Chromium  | 0.10                                                     | 0.14   | 0.24   | 0.03   | n/a                             | n/a    | n/a    | n/a    |
| Manganese | 0.01                                                     | 0.77   | 0.23   | 0.00   | 0.00                            | 0.01   | 0.05   | 0.65   |
| Iron      | 0.00                                                     | 0.07   | 0.06   | 0.57   | 0.02                            | 0.00   | 0.01   | 0.37   |
| Nickel    | 0.00                                                     | 0.06   | 0.01   | 0.01   | n/a                             | n/a    | n/a    | n/a    |
| Copper    | 0.00                                                     | 0.01   | 0.10   | 0.75   | 0.00                            | 0.04   | 0.01   | 0.59   |
| Zinc      | n/a                                                      | n/a    | n/a    | n/a    | 0.01                            | 0.00   | 0.03   | 0.68   |
| Cobalt    | n/a                                                      | n/a    | n/a    | n/a    | 0.12                            | 0.05   | 0.30   | 0.39   |
